# Supplementary material for: Tunable valley polarization effect and second-order topological state in monolayer FeClSH
Source: Royal Society of Chemistry journal article supplement (doi:10.1039/d3cp05127g), 2023-12-28
Supplement: d3cp05127g1.pdf [file d3cp05127g1.pdf]

### Supplementary Information

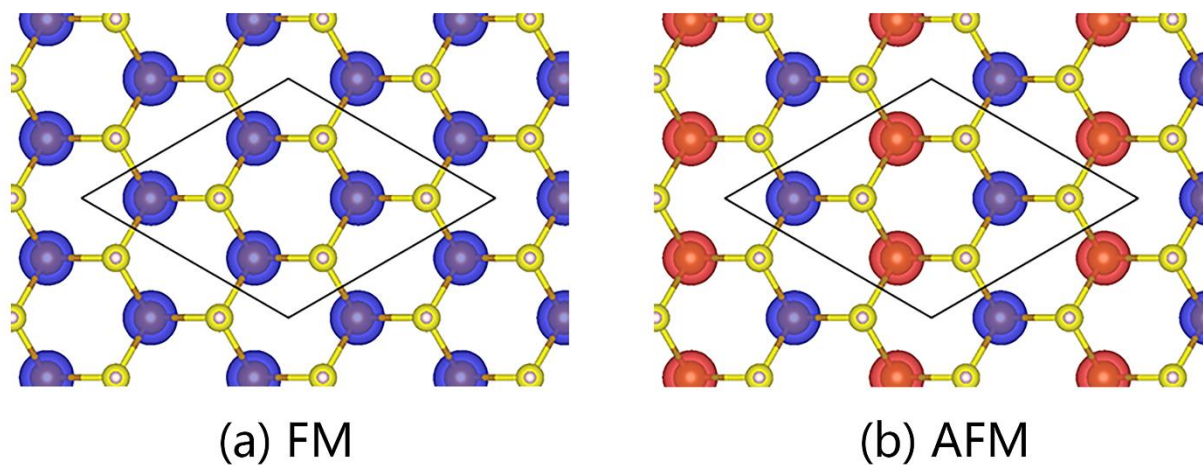

**FIG. S1.** Spatial distribution of spin-polarized electron density of monolayer FeClSH for (a) FM state and (b) AFM state. Blue and red isosurfaces represent spin-up and spin-down electron density, respectively. The black box is a  $2 \times 2 \times 1$  supercell.

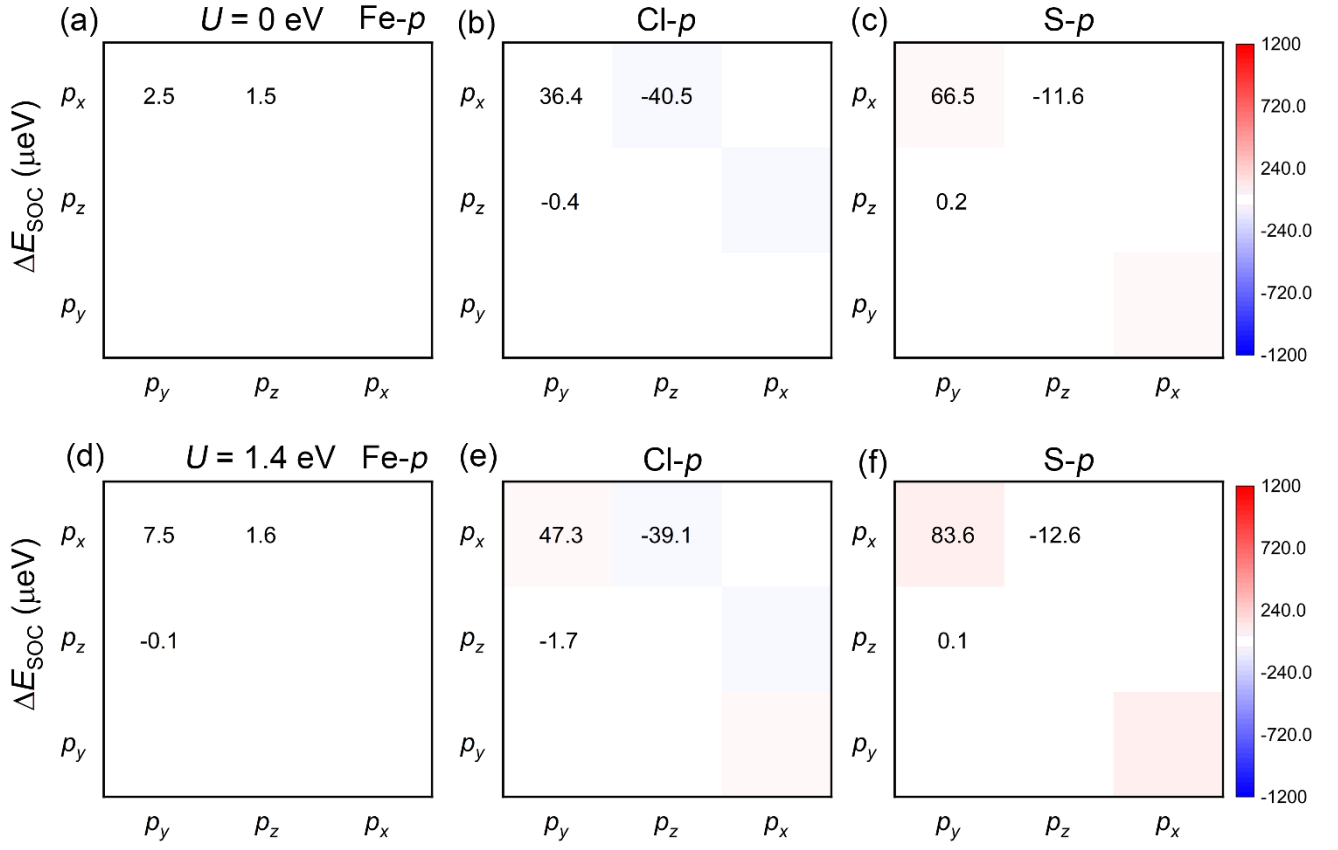

**FIG. S2.** Orbital-resolved  $\Delta E_{\text{SOC}}$  of the monolayer FeClSH for  $U = 0 \text{ eV}$  and  $1.4 \text{ eV}$ . (a) Fe- $p$  orbitals, (b) Cl- $p$  orbitals, and (c) S- $p$  orbitals for  $U = 0 \text{ eV}$ . (d) Fe- $p$  orbitals, (e) Cl- $p$  orbitals, and (f) S- $p$  orbitals for  $U = 1.4 \text{ eV}$ .

**Table S1.** Lattice constant  $a$  ( $\text{\AA}$ ), bond angle ( $^\circ$ ), and  $E_{\text{AFM}} - E_{\text{FM}}$  (meV per unit cell) for  $U = 0 \text{ eV}$  and  $1.4 \text{ eV}$ .

| $U$ | $a$  | Fe-Cl-Fe | Fe-S-Fe | $E_{\text{AFM}} - E_{\text{FM}}$ |
|-----|------|----------|---------|----------------------------------|
| 0   | 3.51 | 87.5     | 92.7    | 133.79                           |
| 0   | 3.57 | 88.1     | 93.6    | 117.66                           |
| 1.4 | 3.51 | 87.5     | 92.7    | 27.56                            |
| 1.4 | 3.57 | 88.1     | 93.6    | 14.13                            |

**Table S2.** Matrix differences of  $|\langle u, \alpha | L_z | o, \beta \rangle|^2 - |\langle u, \alpha | L_y | o, \beta \rangle|^2$  for Fe-*d* orbitals.

| <i>u</i>                                        | <i>o</i> <sup>+</sup>  |                        |                                   |                        |                                                 | <i>o</i> <sup>-</sup>  |                        |                                   |                        |                                                 |
|-------------------------------------------------|------------------------|------------------------|-----------------------------------|------------------------|-------------------------------------------------|------------------------|------------------------|-----------------------------------|------------------------|-------------------------------------------------|
|                                                 | <i>d</i> <sub>xy</sub> | <i>d</i> <sub>yz</sub> | <i>d</i> <sub>z<sup>2</sup></sub> | <i>d</i> <sub>xz</sub> | <i>d</i> <sub>x<sup>2</sup>-y<sup>2</sup></sub> | <i>d</i> <sub>xy</sub> | <i>d</i> <sub>yz</sub> | <i>d</i> <sub>z<sup>2</sup></sub> | <i>d</i> <sub>xz</sub> | <i>d</i> <sub>x<sup>2</sup>-y<sup>2</sup></sub> |
| <i>d</i> <sub>xy</sub>                          | 0                      | 1                      | 0                                 | 0                      | -4                                              | 0                      | -1                     | 0                                 | 0                      | 4                                               |
| <i>d</i> <sub>yz</sub>                          | 1                      | 0                      | 0                                 | -1                     | 0                                               | -1                     | 0                      | 0                                 | 1                      | 0                                               |
| <i>d</i> <sub>z<sup>2</sup></sub>               | 0                      | 0                      | 0                                 | 3                      | 0                                               | 0                      | 0                      | 0                                 | -3                     | 0                                               |
| <i>d</i> <sub>xz</sub>                          | 0                      | -1                     | 3                                 | 0                      | 1                                               | 0                      | 1                      | -3                                | 0                      | -1                                              |
| <i>d</i> <sub>x<sup>2</sup>-y<sup>2</sup></sub> | -4                     | 0                      | 0                                 | 1                      | 0                                               | 4                      | 0                      | 0                                 | -1                     | 0                                               |

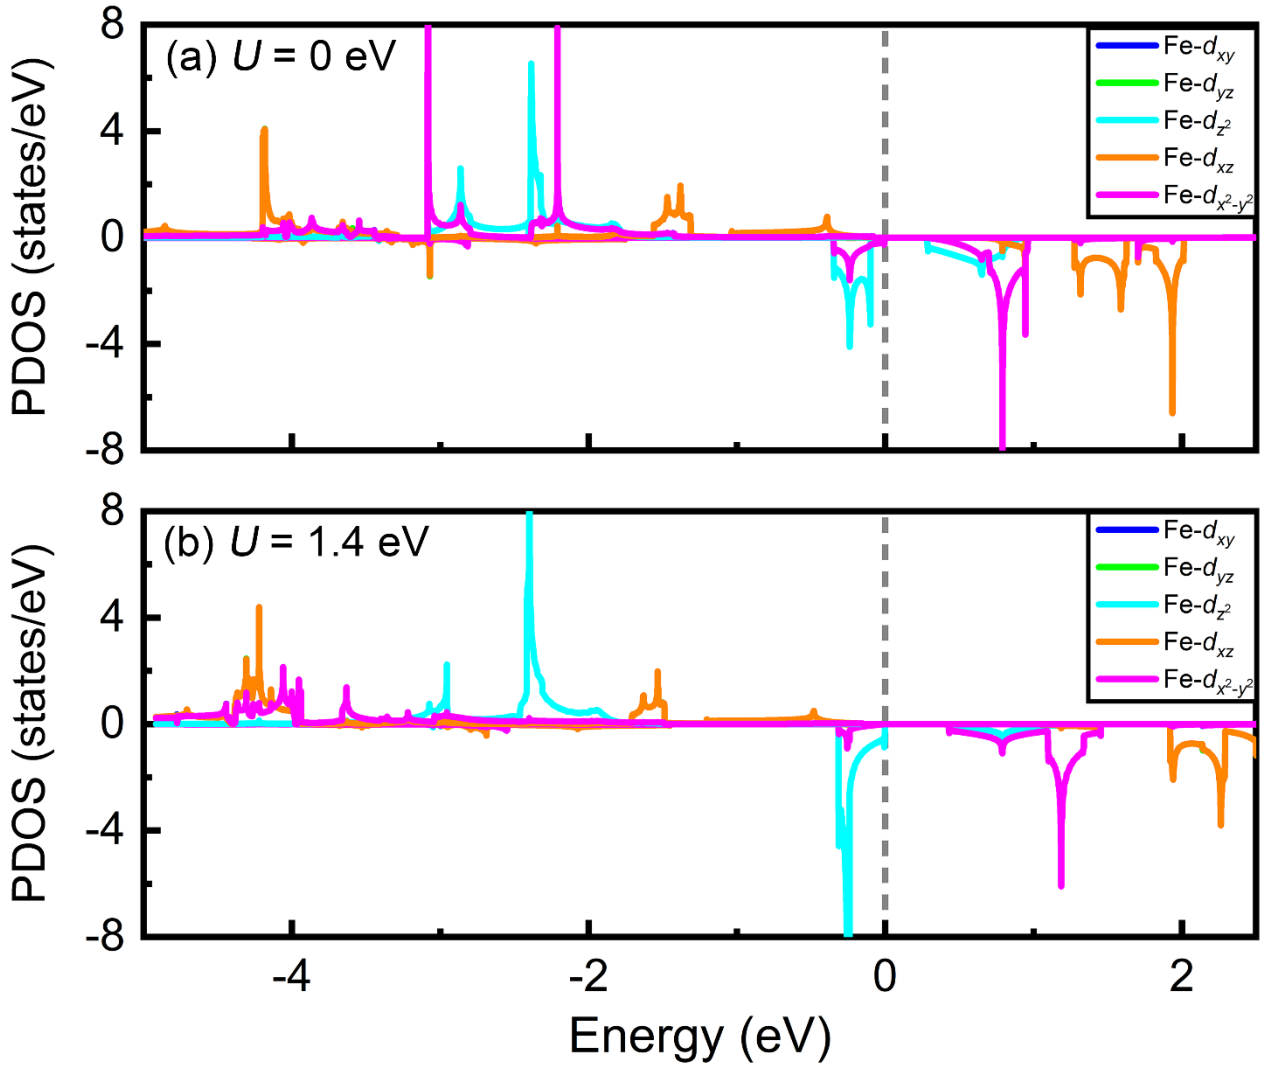

**FIG. S3.** PDOS of different atomic orbitals for (a)  $U = 0$  eV and (b)  $U = 1.4$  eV.

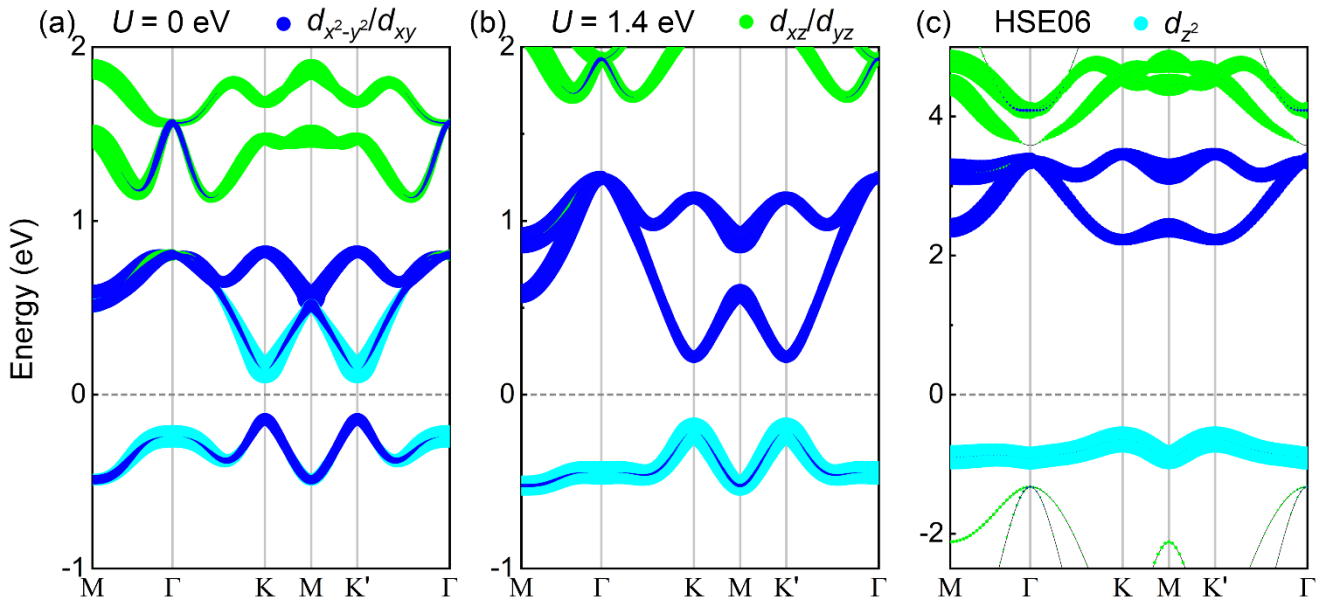

**FIG. S4.** Orbital-resolved band structures of spin-down without SOC for (a)  $U = 0$  eV, (b)  $U = 1.4$  eV, and (c) HSE06.

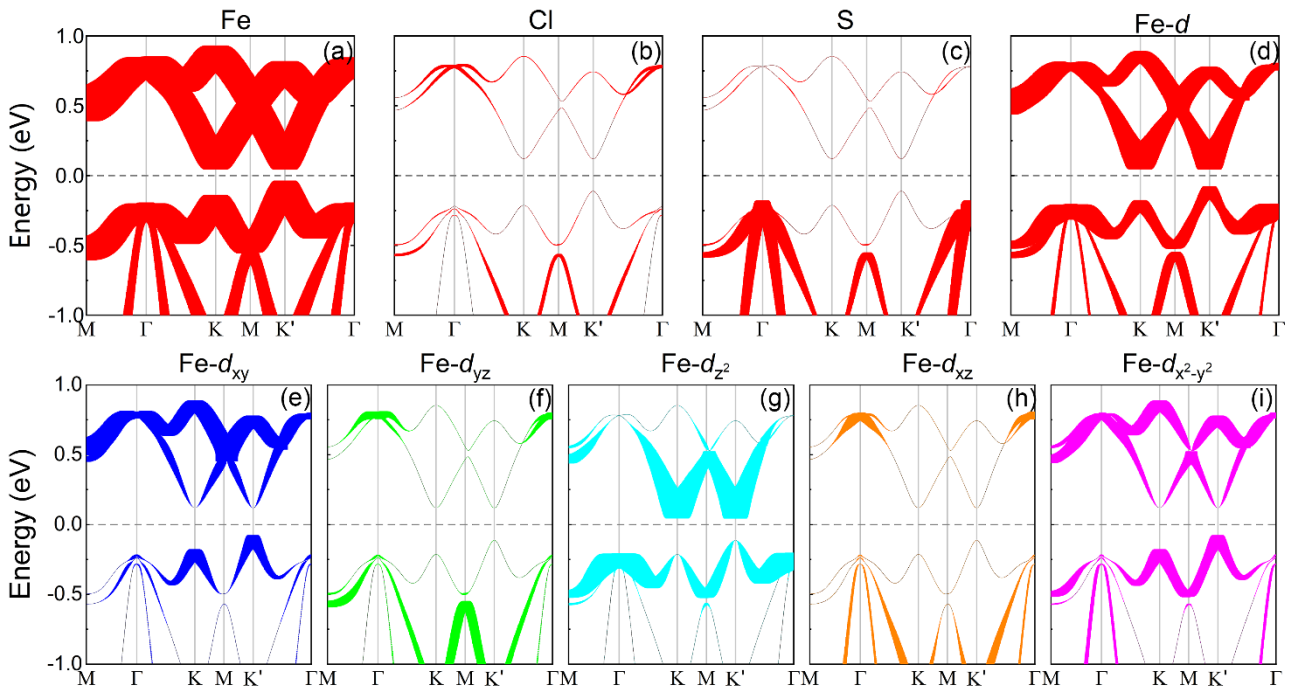

**FIG. S5.** Orbital-resolved band structures with SOC for  $U = 0$  eV.

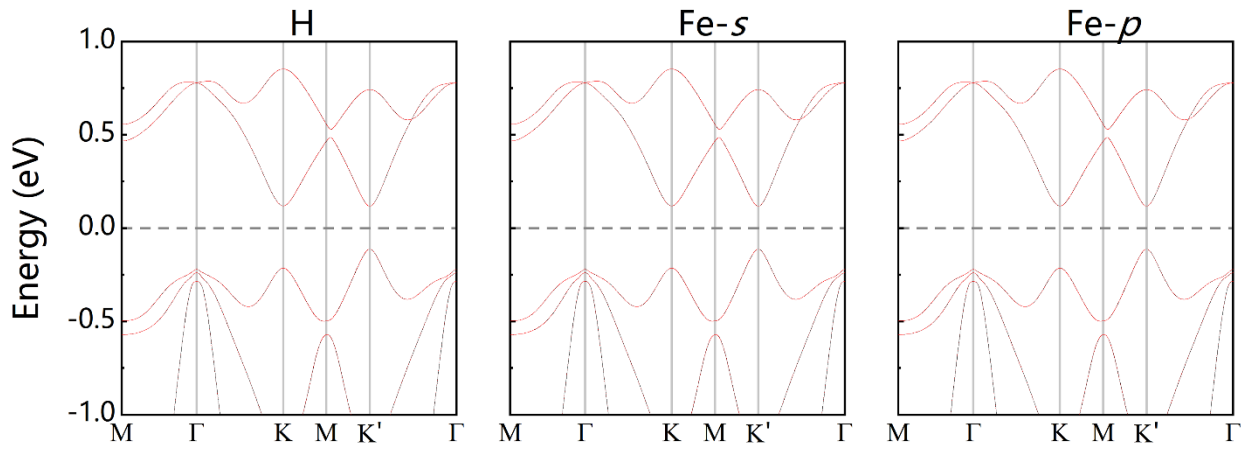

FIG. S6. Orbital-resolved band structures with SOC for  $U = 0$  eV.

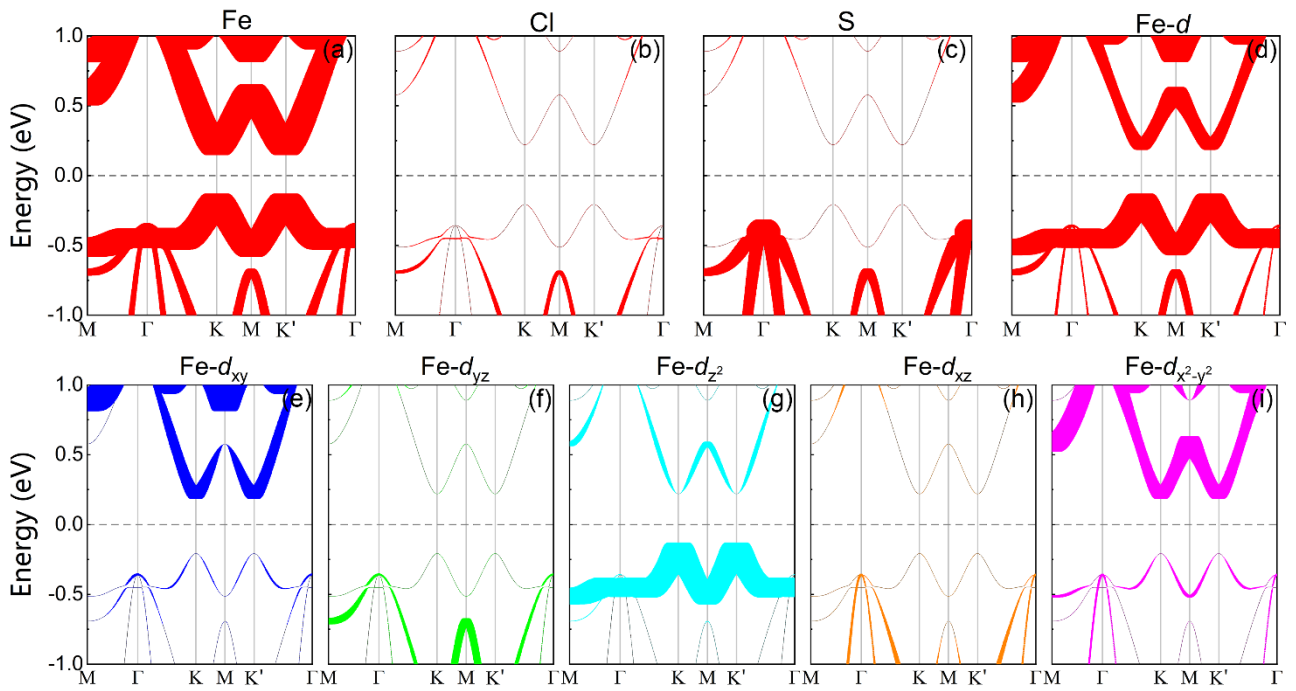

FIG. S7. Orbital-resolved band structures with SOC for  $U = 1.4$  eV.

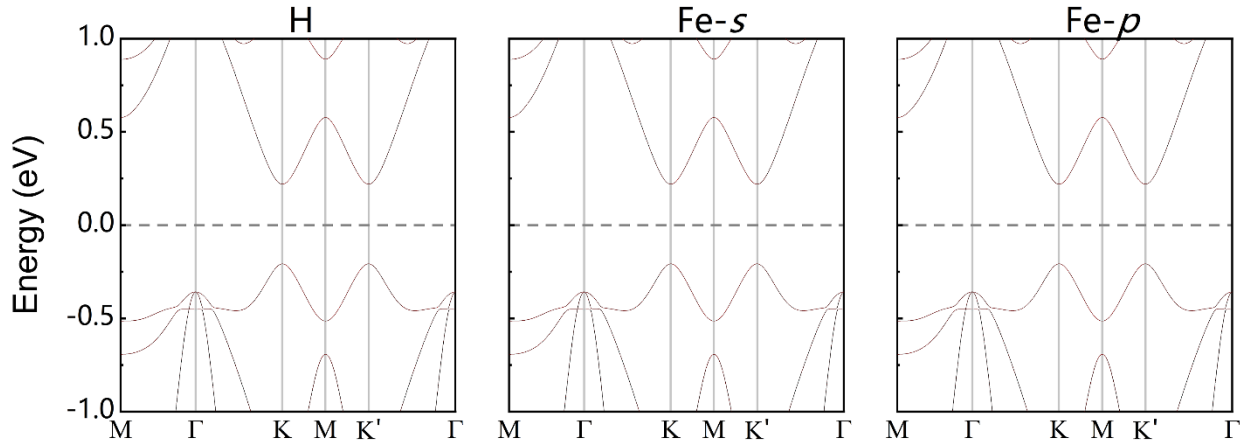

**FIG. S8.** Orbital-resolved band structures with SOC for  $U = 1.4$  eV.

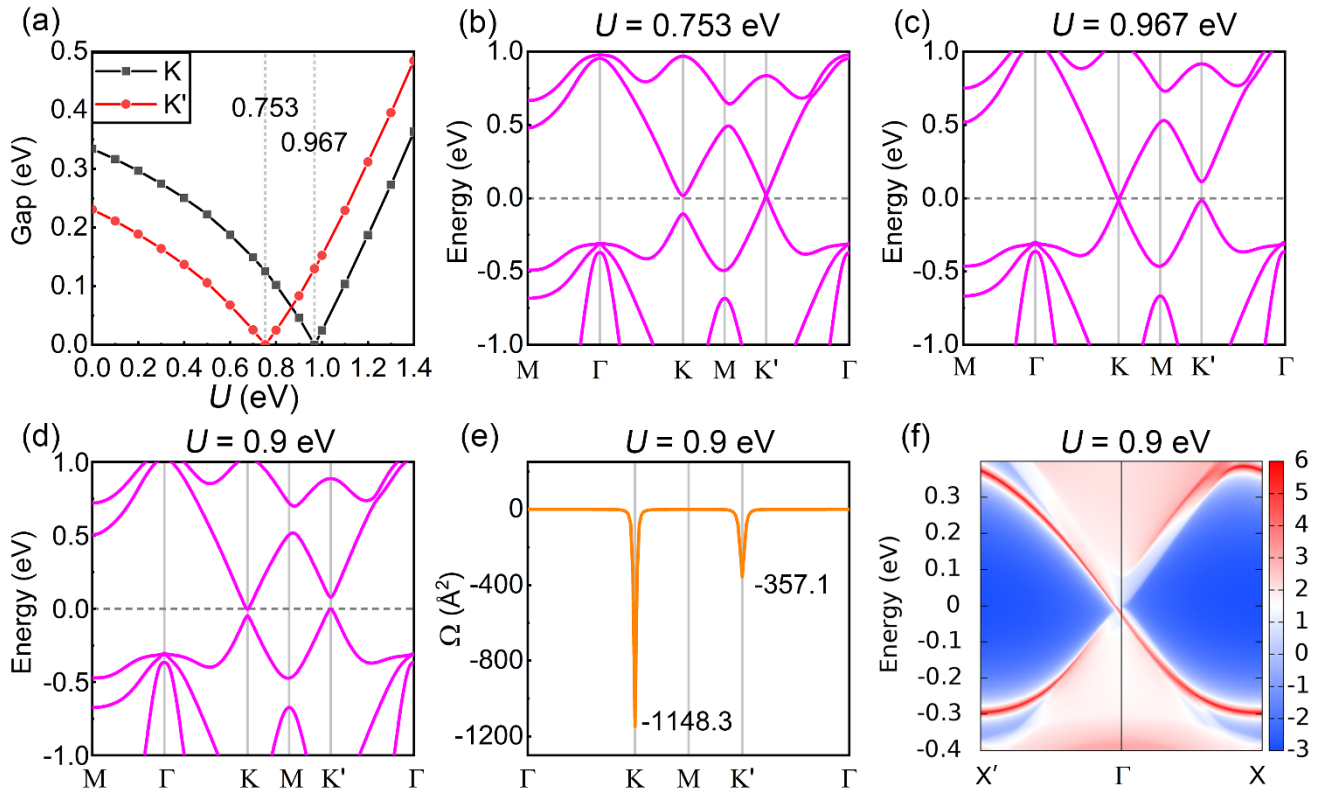

**FIG. S9.** (a) Band gaps located at K and K' valleys and band structures for (b)  $U = 0.753$  eV and (c) 0.967 eV. (d) Band structure, (e) Berry curvature, and (f) edge state for  $U = 0.9$  eV.

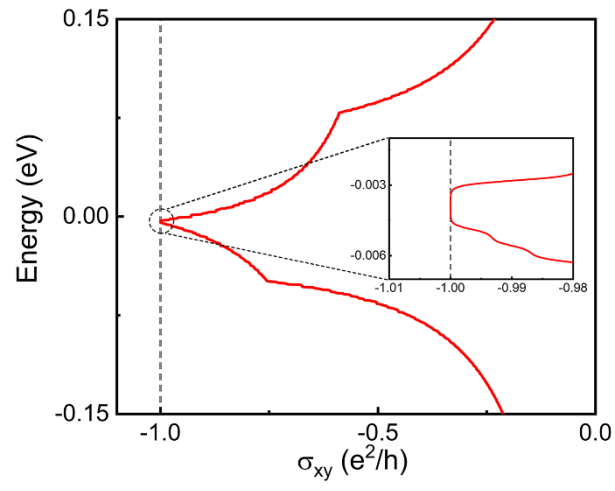

**FIG. S10.** AHC for  $U = 0.9$  eV.
